# Supplementary material for: How do brassinosteroids activate their receptors?
Source: bioRxiv or medRxiv preprint supplement (doi:10.1101/630640), 2019-05-07
Supplement: Supplementary file [file media-1.pdf]

# Supporting information for: How do brassinosteroids activate their receptors?

Alexander S. Moffett<sup>1</sup> and Diwakar Shukla<sup>1,2,3,4</sup>

<sup>1</sup>Center for Biophysics and Quantitative Biology, University of Illinois at Urbana-Champaign

<sup>2</sup>Department of Chemical and Biomolecular Engineering, University of Illinois at Urbana-Champaign

<sup>3</sup>Department of Plant Biology, University of Illinois at Urbana-Champaign

<sup>4</sup>Beckman Institute for Advanced Science and Technology, University of Illinois at Urbana-Champaign

## BRI1 E749 protonation

For the sake of completeness, we report results for BRI1 E749, although BRI1 E749 is unlikely to be protonated at pH 5 (Fig. S25). Counterintuitively, protonation of tBRI1 E749 appeared to strongly stabilize both the apo and holo tBRI1-BAK1 complex (Fig. S24 C-D). As BRI1 E749 interacts with BAK1 R146 in crystal structures (Fig. 1), we expected protonation of BRI1 E749 to break this interaction and weaken the stability of the rBRI1-BAK1 complex. However, for protonation of tBRI1 E749 we estimated  $\Delta\Delta G_{Apo} = -12.225 \pm 0.101$  kcal·mol<sup>-1</sup> and  $\Delta\Delta G_{Holo} = -7.113 \pm 0.102$  kcal·mol<sup>-1</sup>. It appears that the interaction partners of BRI1 E749 in BAK1 are involved in unrealistic interactions with the truncated C-terminus of tBRI1.

## Calculation of association free energies from previously reported dissociation constants

Here, we show our calculations for binding free energy given the dissociation constants obtained by Hohmann and coworkers [1]. We assume a temperature of 300 K and use a standard concentration of  $C^\circ = 1/(1661 \text{ \AA}^3)$ . The standard free energy of association between the BAK1 and BL-bound BRI1 extracellular domains was calculated from grating-coupled interferometry results as follows:

$$\begin{aligned} K_D &= 0.71 \text{ } \mu M = 0.71 \frac{\mu\text{mol}}{L} \cdot \frac{1 \text{ mol}}{10^6 \mu\text{mol}} \cdot \frac{1 L}{10^{27} \text{ \AA}^3} \cdot 6.022 \cdot 10^{23} \text{ mol}^{-1} \approx 4.28 \cdot 10^{-10} \text{ \AA}^{-3} \\ K_A &= \frac{1}{K_D} \approx 2.34 \cdot 10^9 \text{ \AA}^3 \\ \Delta G^\circ &= -RT \log(K_A/1661 \text{ \AA}^3) \approx -8.44 \text{ kcal} \cdot \text{mol}^{-1} \end{aligned}$$

The free energy of association from isothermal titration calorimetry (-9.20 kcal·mol<sup>-1</sup>) was calculated accordingly.

## Calculation of association free energies from REUS

For the sake of brevity, we use the following shorthand notation for averages:  $\langle A(\mathbf{x}) \rangle_{\{\alpha, \beta, \gamma, \dots\}}^E$ , where  $A(\mathbf{x})$  is the quantity, dependent on protein coordinates, to be averaged, the superscript  $E$  denotes the state of the

association progress, either at the binding site ( $S$ ) or in bulk solution ( $B$ ), and  $\{\alpha, \beta, \gamma \dots\}$  represents the set of collective variables restrained when the average is taken. For example,

$$\langle e^{-\beta u_\Theta(\mathbf{x})} \rangle_{\{BR, BA\}}^S = \frac{\int_S e^{-\beta[U(\mathbf{x})+pV(\mathbf{x})+u_{BR}(\mathbf{x})+u_{BA}(\mathbf{x})+u_\Theta(\mathbf{x})]} d\mathbf{x}}{\int_S e^{-\beta[U(\mathbf{x})+pV(\mathbf{x})+u_{BR}(\mathbf{x})+u_{BA}(\mathbf{x})]} d\mathbf{x}} \quad (1)$$

is the average value of  $e^{-\beta u_\Theta(\mathbf{x})}$  in the  $NPT$  ensemble,  $u_\Theta(\mathbf{x})$  being the restraint potential on  $\Theta$ , with BRI1 and BAK1 bound and with the BRI1 and BAK1 backbone atoms restrained. The overall calculations of standard association free energies proceed as follows:

$$\Delta G_{BR}^S = \beta^{-1} \ln [\langle e^{-\beta u_{BR}(\mathbf{x})} \rangle^S] \quad (2)$$

$$\Delta G_{BA}^S = \beta^{-1} \ln [\langle e^{-\beta u_{BA}(\mathbf{x})} \rangle_{\{BR\}}^S] \quad (3)$$

$$\Delta G_\Theta^S = \beta^{-1} \ln [\langle e^{-\beta u_\Theta(\mathbf{x})} \rangle_{\{BR, BA\}}^S] \quad (4)$$

$$\Delta G_\Phi^S = \beta^{-1} \ln [\langle e^{-\beta u_\Phi(\mathbf{x})} \rangle_{\{BR, BA, \Theta\}}^S] \quad (5)$$

$$\Delta G_\Psi^S = \beta^{-1} \ln [\langle e^{-\beta u_\Psi(\mathbf{x})} \rangle_{\{BR, BA, \Theta, \Phi\}}^S] \quad (6)$$

$$\Delta G_\phi^S = \beta^{-1} \ln [\langle e^{-\beta u_\phi(\mathbf{x})} \rangle_{\{BR, BA, \Theta, \Phi, \Psi\}}^S] \quad (7)$$

$$\Delta G_\theta^S = \beta^{-1} \ln [\langle e^{-\beta u_\theta(\mathbf{x})} \rangle_{\{BR, BA, \Theta, \Phi, \Psi, \phi\}}^S] \quad (8)$$

$$\Delta G_{BL}^S = \beta^{-1} \ln [\langle e^{-\beta u_{BL}(\mathbf{x})} \rangle_{\{BR, BA, \Theta, \Phi, \Psi, \phi, \theta\}}^S] \quad (9)$$

$$\Delta G_{BL}^B = \beta^{-1} \ln [\langle e^{-\beta u_{BL}(\mathbf{x})} \rangle_{\{BR, BA, \Theta, \Phi, \Psi, \phi, \theta\}}^B] \quad (10)$$

$$\Delta G_\theta^B = \beta^{-1} \ln [\langle e^{-\beta u_\theta(\mathbf{x})} \rangle_{\{BR, BA, \Theta, \Phi, \Psi, \phi\}}^B] \quad (11)$$

$$\Delta G_\phi^B = \beta^{-1} \ln [\langle e^{-\beta u_\phi(\mathbf{x})} \rangle_{\{BR, BA, \Theta, \Phi, \Psi\}}^B] \quad (12)$$

$$\Delta G_\Psi^B = \beta^{-1} \ln [\langle e^{-\beta u_\Psi(\mathbf{x})} \rangle_{\{BR, BA, \Theta, \Phi\}}^B] \quad (13)$$

$$\Delta G_\Phi^B = \beta^{-1} \ln [\langle e^{-\beta u_\Phi(\mathbf{x})} \rangle_{\{BR, BA, \Theta\}}^B] \quad (14)$$

$$\Delta G_\Theta^B = \beta^{-1} \ln [\langle e^{-\beta u_\Theta(\mathbf{x})} \rangle_{\{BR, BA\}}^B] \quad (15)$$

$$\Delta G_{BA}^B = \beta^{-1} \ln [\langle e^{-\beta u_{BA}(\mathbf{x})} \rangle_{\{BR\}}^B] \quad (16)$$

$$\Delta G_{BR}^B = \beta^{-1} \ln [\langle e^{-\beta u_{BR}(\mathbf{x})} \rangle^B] \quad (17)$$

$$\Delta G_0^S = \Delta G_\Theta^S + \Delta G_\Phi^S + \Delta G_\Psi^S + \Delta G_\theta^S + \Delta G_\phi^S \quad (18)$$

$$\Delta G_0^B = \Delta G_\Theta^B + \Delta G_\Phi^B + \Delta G_\Psi^B = -\beta^{-1} \ln \left[ \frac{1}{8\pi^2} \int_0^\pi \int_0^{2\pi} \int_0^{2\pi} \sin(\Theta) e^{-\beta u_0(\Theta, \Phi, \Psi)} d\Psi d\Phi d\Theta \right] \quad (19)$$

$$I^* = \int_{bound} e^{-\beta[W(r)-W(r^*)]} dr \quad (20)$$

$$O^* = (r^*)^2 \int_0^\pi \int_0^{2\pi} \sin(\theta) e^{-\beta u_a(\theta, \phi)} d\theta d\phi \quad (21)$$

$$K_A^{Apo} = O^* I^* e^{-\beta[(\Delta G_{BR}^B - \Delta G_{BR}^S) + (\Delta G_{BA}^B - \Delta G_{BA}^S) + (\Delta G_0^B - \Delta G_0^S)]} \quad (22)$$

$$K_A^{BL} = O^* I^* e^{-\beta[(\Delta G_{BR}^B - \Delta G_{BR}^S) + (\Delta G_{BA}^B - \Delta G_{BA}^S) + (\Delta G_0^B - \Delta G_0^S) + (\Delta G_{BL}^B - \Delta G_{BL}^S)]} \quad (23)$$

$$\Delta G^\circ = -\beta^{-1} \ln [K_A C^\circ], \quad C^\circ = \frac{1}{1661 \text{\AA}^3} \quad (24)$$

Note that the  $O^*$  and  $\Delta G_0^B$  terms can be calculated analytically, as shown below, while each other term requires MD simulation.

### Apo orientational restraint contribution

$$\begin{aligned}
O_{Apo}^* &= (r^*)^2 \int_0^\pi \int_0^{2\pi} \sin(\Theta) e^{-\beta u_a(\Theta, \Phi)} d\Phi d\Theta \\
&= (44 \text{ \AA})^2 \int_0^{2\pi} e^{-\beta(.5)(.1)(180/\pi)^2(\Phi-16.8963(\pi/180))^2} d\Phi \int_0^\pi \sin(\Theta) e^{-\beta(.5)(.1)(180/\pi)^2(\Theta-120.4496(\pi/180))^2} d\Theta \\
&= (1936 \text{ \AA}^2)(0.106819)(0.0920026) = 19.0262 \text{ \AA}^2
\end{aligned}$$

### Apo bulk angular restraint contributions

$$\begin{aligned}
\Delta G_{0,Apo}^B &= -\beta^{-1} \ln \left[ \frac{1}{8\pi^2} \int_0^\pi \int_0^{2\pi} \int_0^{2\pi} \sin(\Theta) e^{-\beta u_0(\Theta, \Phi, \Psi)} d\Psi d\Phi d\Theta \right] \\
&= -\beta^{-1} \ln \left[ \frac{1}{8\pi^2} \int_0^{2\pi} e^{-\beta(.5)(.1)(180/\pi)^2(\Psi-33.0273(\pi/180))^2} d\Psi \int_0^{2\pi} e^{-\beta(.5)(.1)(180/\pi)^2(\phi-261.461(\pi/180))^2} d\phi \right. \\
&\quad \left. \int_0^\pi \sin(\theta) e^{-\beta(.5)(.1)(180/\pi)^2(\theta-73.4478(\pi/180))^2} d\theta \right] \\
&= 6.63 \text{ kcal} \cdot \text{mol}^{-1}
\end{aligned}$$

### Holo orientational restraint contribution

$$\begin{aligned}
O_{Holo}^* &= (r^*)^2 \int_0^\pi \int_0^{2\pi} \sin(\Theta) e^{-\beta u_a(\Theta, \Phi)} d\Phi d\Theta \\
&= (44 \text{ \AA})^2 \int_0^{2\pi} e^{-\beta(.5)(.1)(180/\pi)^2(\Phi-15.9178(\pi/180))^2} d\Phi \int_0^\pi \sin(\Theta) e^{-\beta(.5)(.1)(180/\pi)^2(\Theta-118.5843(\pi/180))^2} d\Theta \\
&= (1936 \text{ \AA}^2)(0.106819)(0.0937143) = 19.3802 \text{ \AA}^2
\end{aligned}$$

### Holo bulk angular restraint contributions

$$\begin{aligned}
\Delta G_{0,Holo}^B &= -\beta^{-1} \ln \left[ \frac{1}{8\pi^2} \int_0^\pi \int_0^{2\pi} \int_0^{2\pi} \sin(\Theta) e^{-\beta u_0(\Theta, \Phi, \Psi)} d\Psi d\Phi d\Theta \right] \\
&= -\beta^{-1} \ln \left[ \frac{1}{8\pi^2} \int_0^{2\pi} e^{-\beta(.5)(.1)(180/\pi)^2(\Psi-33.7587(\pi/180))^2} d\Psi \int_0^{2\pi} e^{-\beta(.5)(.1)(180/\pi)^2(\phi-267.2762(\pi/180))^2} d\phi \right. \\
&\quad \left. \int_0^\pi \sin(\theta) e^{-\beta(.5)(.1)(180/\pi)^2(\theta-75.9999(\pi/180))^2} d\theta \right] \\
&= 6.62 \text{ kcal} \cdot \text{mol}^{-1}
\end{aligned}$$

## References

- [1] Hohmann U, Santiago J, Nicolet J, Olsson V, Spiga FM, Hothorn LA, Butenko MA, Hothorn M. Mechanistic basis for the activation of plant membrane receptor kinases by SERK-family coreceptors. *Proc Natl Acad Sci USA*. 2018; p. 201714972. doi:10.1073/pnas.1714972115.
- [2] Hunter JD. Matplotlib: A 2D graphics environment. *Comput Sci Eng*. 2007;9(3):90–95. doi:10.1109/MCSE.2007.55.
- [3] Chodera JD. A simple method for automated equilibration detection in molecular simulations. *J Chem Theory Comput*. 2016;12(4):1799–1805. doi:10.1021/acs.jctc.5b00784.
- [4] pymbar 3.0.4; <https://pymbar.readthedocs.io/en/master/>.

- [5] Shirts MR, Chodera JD. Statistically optimal analysis of samples from multiple equilibrium states. *J Chem Phys.* 2008;129(12):124105. doi:10.1063/1.2978177.
- [6] Søndergaard CR, Olsson MH, Rostkowski M, Jensen JH. Improved treatment of ligands and coupling effects in empirical calculation and rationalization of  $pK_a$  values. *J Chem Theory Comput.* 2011;7(7):2284–2295. doi:10.1021/ct200133y.
- [7] Olsson MH, Søndergaard CR, Rostkowski M, Jensen JH. PROPKA3: consistent treatment of internal and surface residues in empirical  $pK_a$  predictions. *J Chem Theory Comput.* 2011;7(2):525–537. doi:10.1021/ct100578z.

**Table S1:** Force constants and reference collective variable values used for restraints in REUS PMF calculations.

| Collective variable | $k_{Force}$       | Apo reference | Holo reference |
|---------------------|-------------------|---------------|----------------|
| BRI1 RMSD           | 10.0*             | 1.1825 Å      | 1.1492 Å       |
| BAK1 RMSD           | 10.0*             | 1.1973 Å      | 1.3730 Å       |
| $\Theta$            | 0.10 <sup>†</sup> | 120.4496°     | 118.5843°      |
| $\Phi$              | 0.10 <sup>†</sup> | 16.8963°      | 15.9178°       |
| $\Psi$              | 0.10 <sup>†</sup> | 33.0273°      | 33.7587°       |
| $\phi$              | 0.10 <sup>†</sup> | 261.461°      | 267.2762°      |
| $\theta$            | 0.10 <sup>†</sup> | 73.4478°      | 75.9999°       |
| BL-BRI1 distance    | 10.0*             | N/A           | 18.7735 Å      |

\* $\text{kcal}\cdot\text{mol}^{-1}\cdot\text{\AA}^{-2}$  † $\text{kcal}\cdot\text{mol}^{-1}\cdot\text{degree}^{-2}$

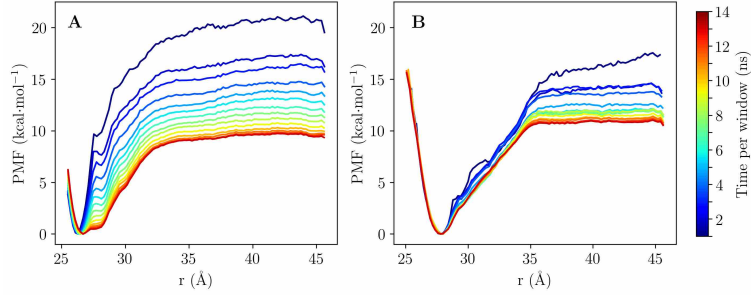

**Figure S1:** Convergence of the **A** apo and **B** holo tBRI1-BAK1 separation PMFs with REUS sampling time per window. This figure was produced using Matplotlib 2.2.2 [2].

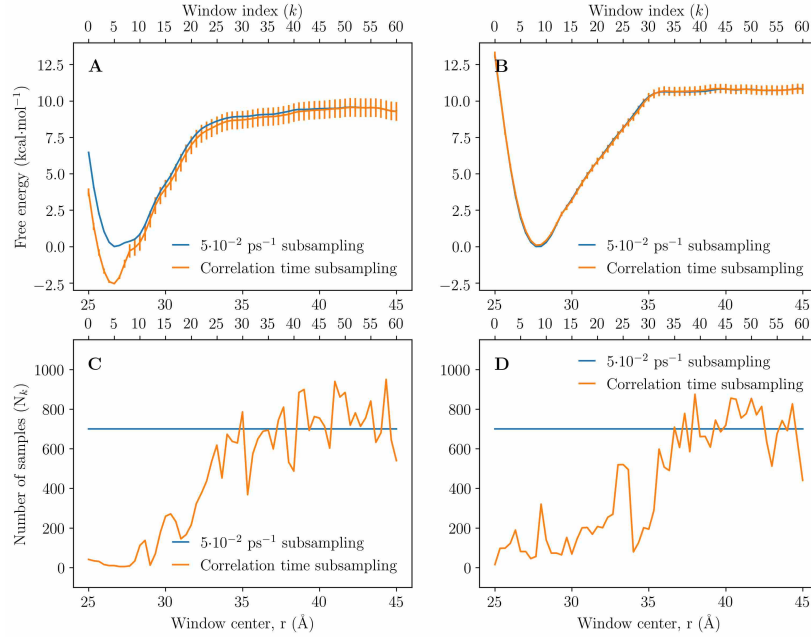

**Figure S2:** Rationale for our choice of a uniform  $50 \text{ ns}^{-1}$  subsampling rate for REUS simulations. **A** The apo and **B** holo separation PMFs using a uniform  $50 \text{ ns}^{-1}$  subsampling rate and a subsampling rate determined individually for each window using the correlation time method implemented in pymbar [3, 4]. The number of samples remaining for each window for the **C** apo and **D** holo systems. Using the correlation time to subsample yields uncorrelated samples but at the same time causes highly uneven sampling across  $r$ . Using a uniform subsampling time of  $50 \text{ ns}^{-1}$  by definition yields even sampling over  $r$ , but likely results in the use of correlated samples in some windows, leading to underestimation of error [5]. This figure was produced using Matplotlib 2.2.2 [2].

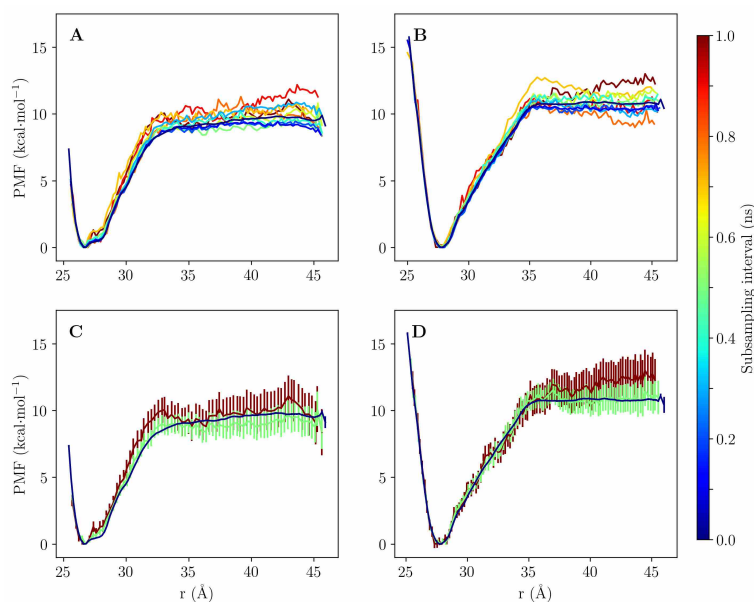

**Figure S3:** The effects of subsampling rate on the **A** apo and **B** holo separation PMFs. We chose three subsampling rates to include with error bars shown for the **C** apo and **D** holo separation PMFs. Note the general insensitivity to both separation PMFs to the choice of uniform subsampling rate over all windows. This figure was produced using Matplotlib 2.2.2 [2].

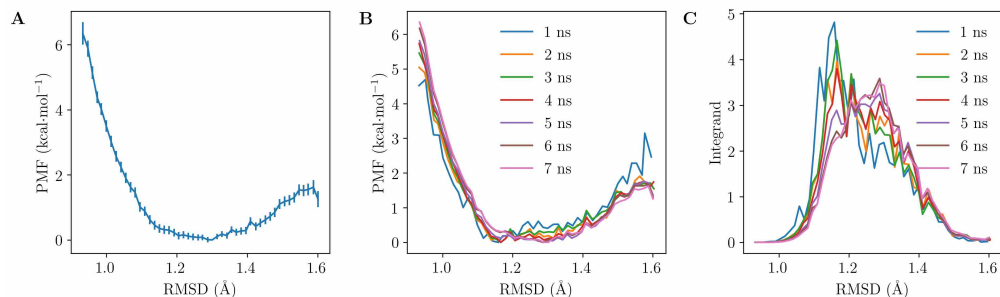

**Figure S4:** tBRI1 conformational restraint contributions for bound apo BRI1-BAK1. **A** The restraint PMF. **B** Convergence of the restraint PMF with simulation time. **C** Convergence of the integrand within the associated ensemble average estimation with time. This figure was produced using Matplotlib 2.2.2 [2].

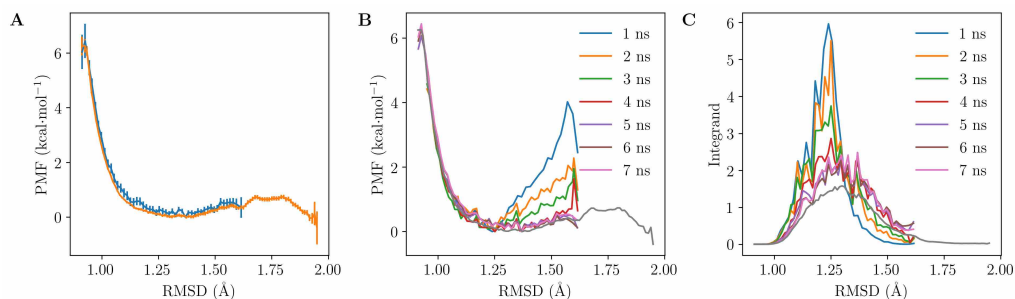

**Figure S5:** BAK1 conformational restraint contributions for bound apo BRI1-BAK1. **A** The restraint PMF. The PMF including additional umbrella sampling is shown in orange. **B** Convergence of the restraint PMF with simulation time. The PMF including additional umbrella sampling is shown in grey. **C** Convergence of the integrand within the associated ensemble average estimation with time. The integrand including additional umbrella sampling is shown in orange. This figure was produced using Matplotlib 2.2.2 [2].

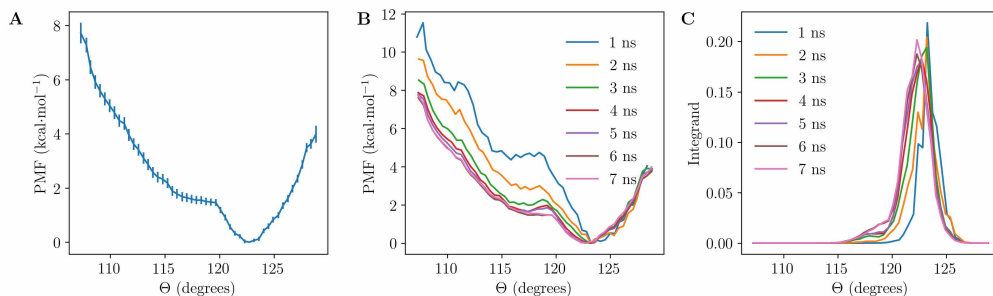

**Figure S6:**  $\Theta$  restraint contributions for bound apo BRI1-BAK1. **A** The restraint PMF. **B** Convergence of the restraint PMF with simulation time. **C** Convergence of the integrand within the associated ensemble average estimation with time. This figure was produced using Matplotlib 2.2.2 [2].

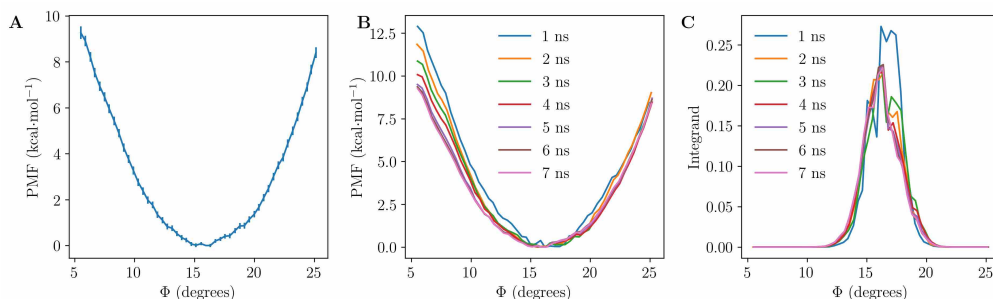

**Figure S7:**  $\Phi$  restraint contributions for bound apo BRI1-BAK1. **A** The restraint PMF. **B** Convergence of the restraint PMF with simulation time. **C** Convergence of the integrand within the associated ensemble average estimation with time. This figure was produced using Matplotlib 2.2.2 [2].

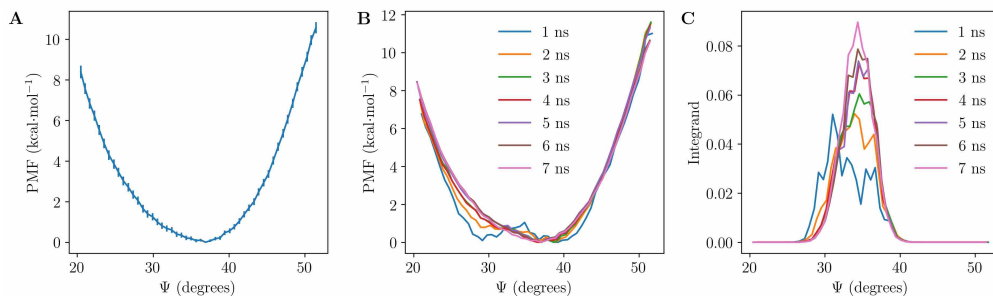

**Figure S8:**  $\Psi$  restraint contributions for bound apo BRI1-BAK1. **A** The restraint PMF. **B** Convergence of the restraint PMF with simulation time. **C** Convergence of the integrand within the associated ensemble average estimation with time. This figure was produced using Matplotlib 2.2.2 [2].

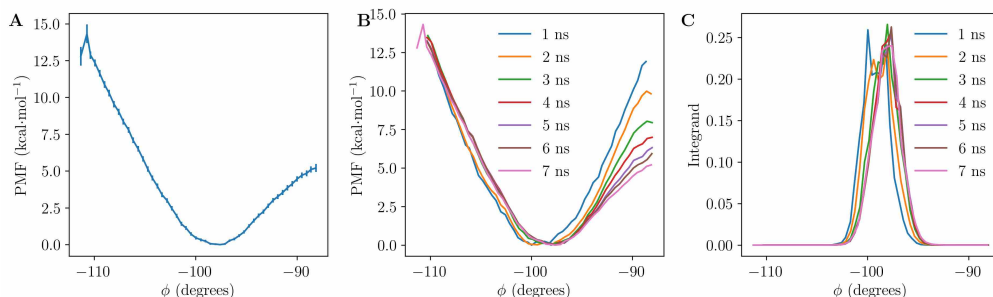

**Figure S9:**  $\phi$  restraint contributions for bound apo BRI1-BAK1. **A** The restraint PMF. **B** Convergence of the restraint PMF with simulation time. **C** Convergence of the integrand within the associated ensemble average estimation with time. This figure was produced using Matplotlib 2.2.2 [2].

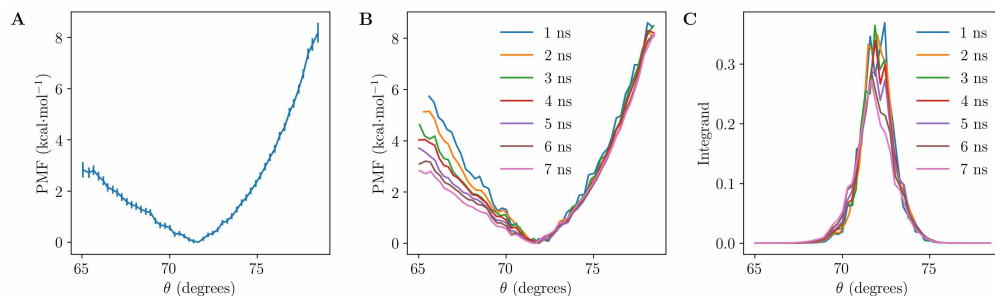

**Figure S10:**  $\theta$  restraint contributions for bound apo BRI1-BAK1. **A** The restraint PMF. **B** Convergence of the restraint PMF with simulation time. **C** Convergence of the integrand within the associated ensemble average estimation with time. This figure was produced using Matplotlib 2.2.2 [2].

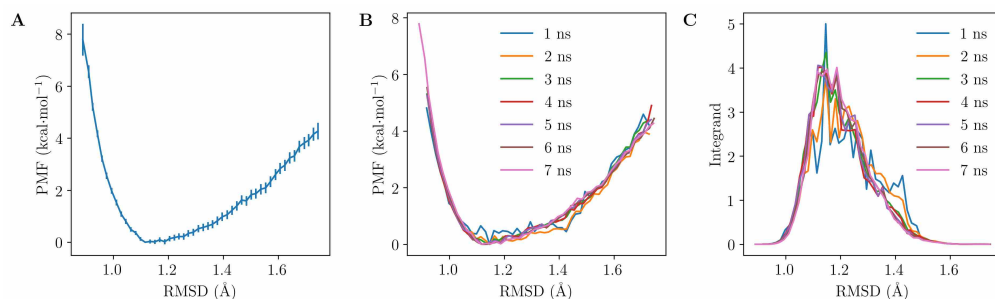

**Figure S11:** BAK1 conformational restraint contributions for unbound apo BRI1-BAK1. **A** The restraint PMF. **B** Convergence of the restraint PMF with simulation time. **C** Convergence of the integrand within the associated ensemble average estimation with time. This figure was produced using Matplotlib 2.2.2 [2].

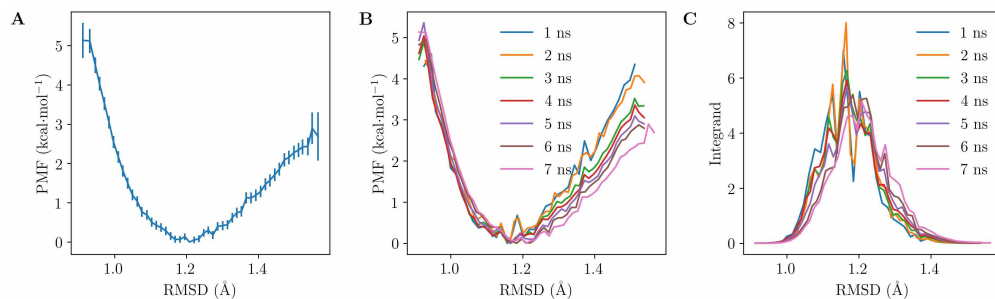

**Figure S12:** tBRI1 conformational restraint contributions for unbound apo BRI1-BAK1. **A** The restraint PMF. **B** Convergence of the restraint PMF with simulation time. **C** Convergence of the integrand within the associated ensemble average estimation with time. This figure was produced using Matplotlib 2.2.2 [2].

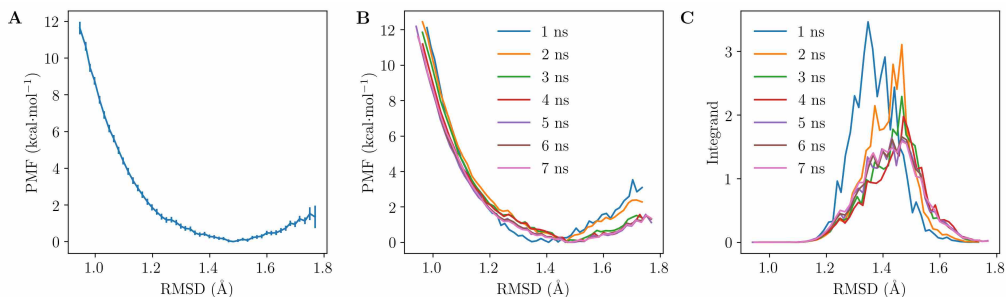

**Figure S13:** tBRI1 conformational restraint contributions for bound holo BRI1-BAK1. **A** The restraint PMF. **B** Convergence of the restraint PMF with simulation time. **C** Convergence of the integrand within the associated ensemble average estimation with time. This figure was produced using Matplotlib 2.2.2 [2].



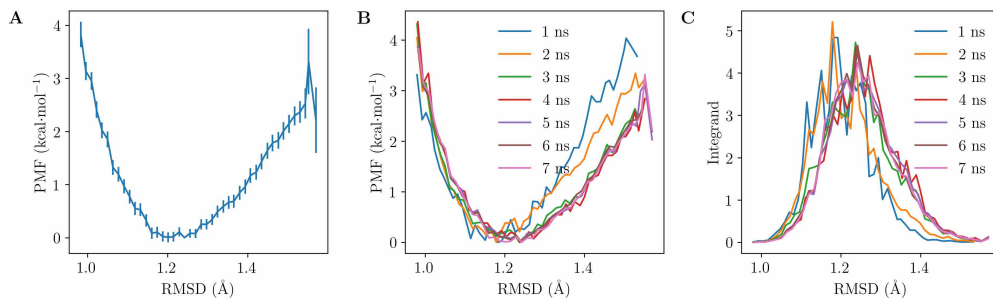

**Figure S14:** BAK1 conformational restraint contributions for bound holo BRI1-BAK1. **A** The restraint PMF. **B** Convergence of the restraint PMF with simulation time. **C** Convergence of the integrand within the associated ensemble average estimation with time. This figure was produced using Matplotlib 2.2.2 [2].

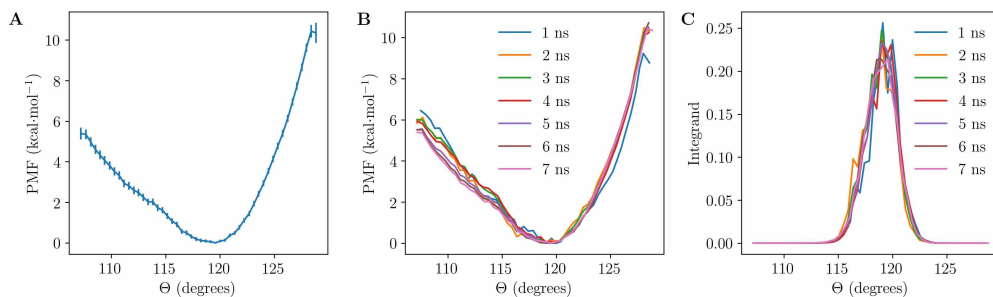

**Figure S15:**  $\Theta$  restraint contributions for bound holo BRI1-BAK1. **A** The restraint PMF. **B** Convergence of the restraint PMF with simulation time. **C** Convergence of the integrand within the associated ensemble average estimation with time. This figure was produced using Matplotlib 2.2.2 [2].

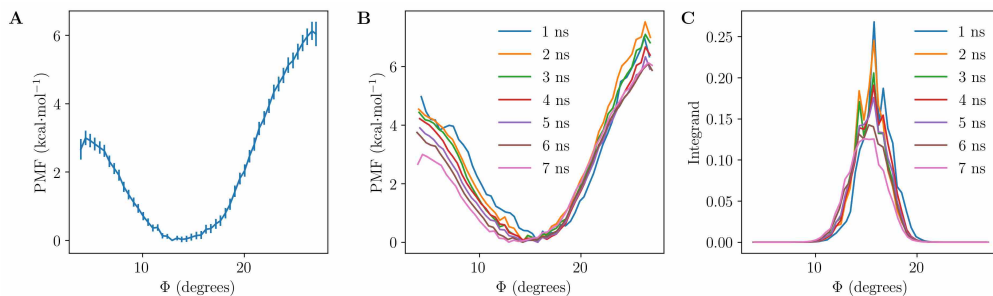

**Figure S16:**  $\Phi$  restraint contributions for bound holo BRI1-BAK1. **A** The restraint PMF. **B** Convergence of the restraint PMF with simulation time. **C** Convergence of the integrand within the associated ensemble average estimation with time. This figure was produced using Matplotlib 2.2.2 [2].

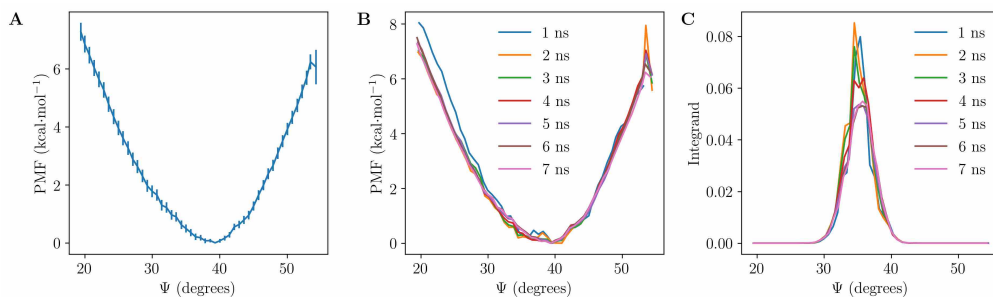

**Figure S17:**  $\Psi$  restraint contributions for bound holo BRI1-BAK1. **A** The restraint PMF. **B** Convergence of the restraint PMF with simulation time. **C** Convergence of the integrand within the associated ensemble average estimation with time. This figure was produced using Matplotlib 2.2.2 [2].

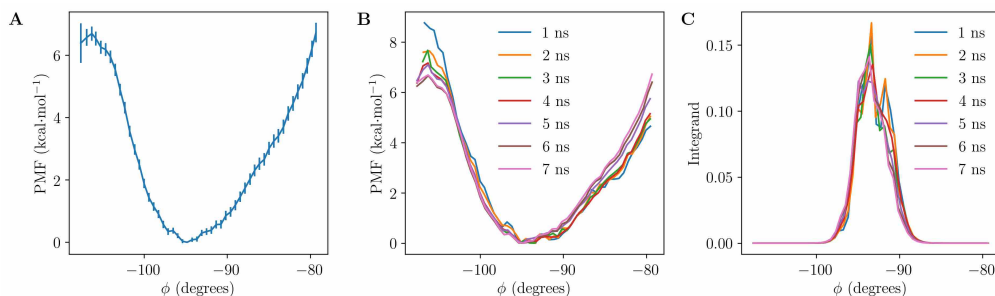

**Figure S18:**  $\phi$  restraint contributions for bound holo BRI1-BAK1. **A** The restraint PMF. **B** Convergence of the restraint PMF with simulation time. **C** Convergence of the integrand within the associated ensemble average estimation with time. This figure was produced using Matplotlib 2.2.2 [2].

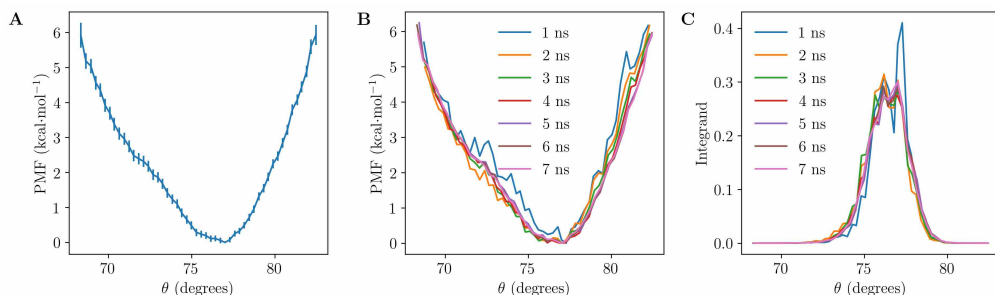

**Figure S19:**  $\theta$  restraint contributions for bound holo BRI1-BAK1. **A** The restraint PMF. **B** Convergence of the restraint PMF with simulation time. **C** Convergence of the integrand within the associated ensemble average estimation with time. This figure was produced using Matplotlib 2.2.2 [2].

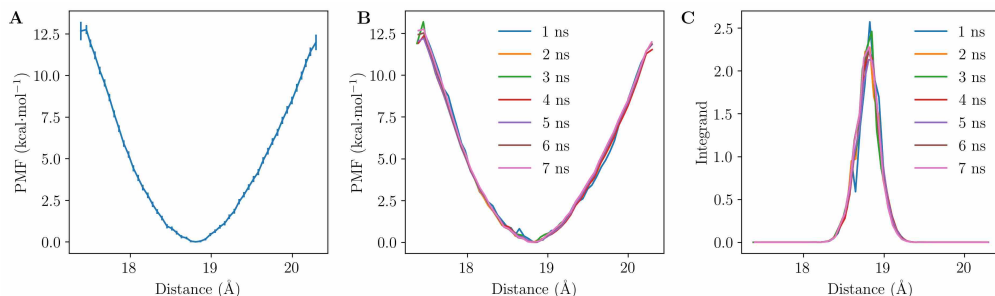

**Figure S20:** BL restraint contributions for bound holo BRI1-BAK1. **A** The restraint PMF. **B** Convergence of the restraint PMF with simulation time. **C** Convergence of the integrand within the associated ensemble average estimation with time. This figure was produced using Matplotlib 2.2.2 [2].

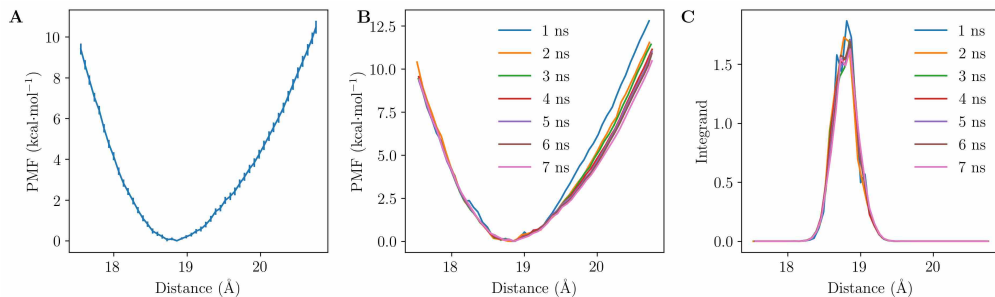

**Figure S21:** BL restraint contributions for unbound holo BRI1-BAK1. **A** The restraint PMF. **B** Convergence of the restraint PMF with simulation time. **C** Convergence of the integrand within the associated ensemble average estimation with time. This figure was produced using Matplotlib 2.2.2 [2].

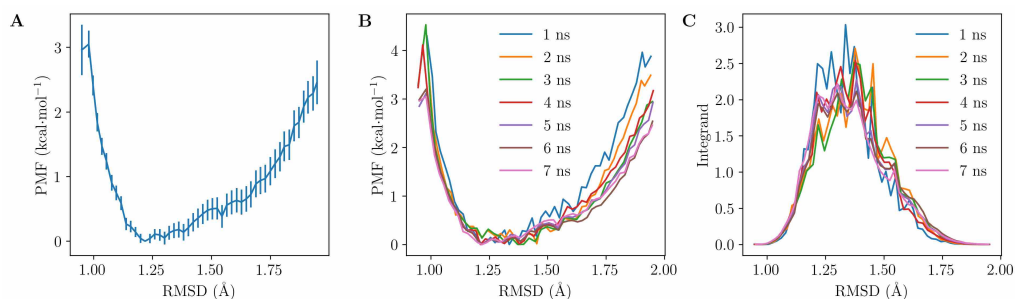

**Figure S22:** BAK1 conformational restraint contributions for unbound holo BRI1-BAK1. **A** The restraint PMF. **B** Convergence of the restraint PMF with simulation time. **C** Convergence of the integrand within the associated ensemble average estimation with time. This figure was produced using Matplotlib 2.2.2 [2].

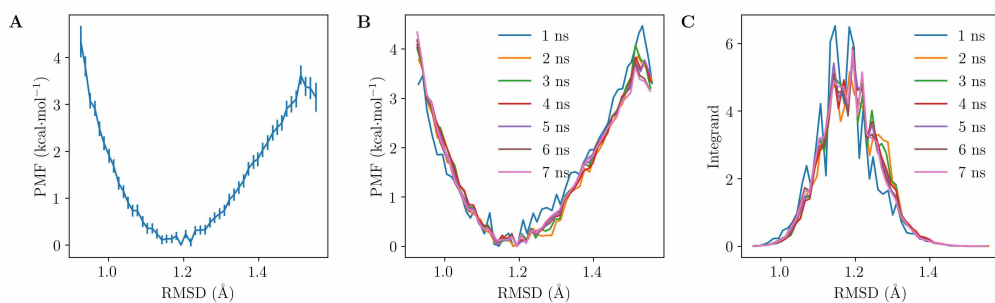

**Figure S23:** tBRI1 conformational restraint contributions for unbound holo BRI1-BAK1. **A** The restraint PMF. **B** Convergence of the restraint PMF with simulation time. **C** Convergence of the integrand within the associated ensemble average estimation with time. This figure was produced using Matplotlib 2.2.2 [2].

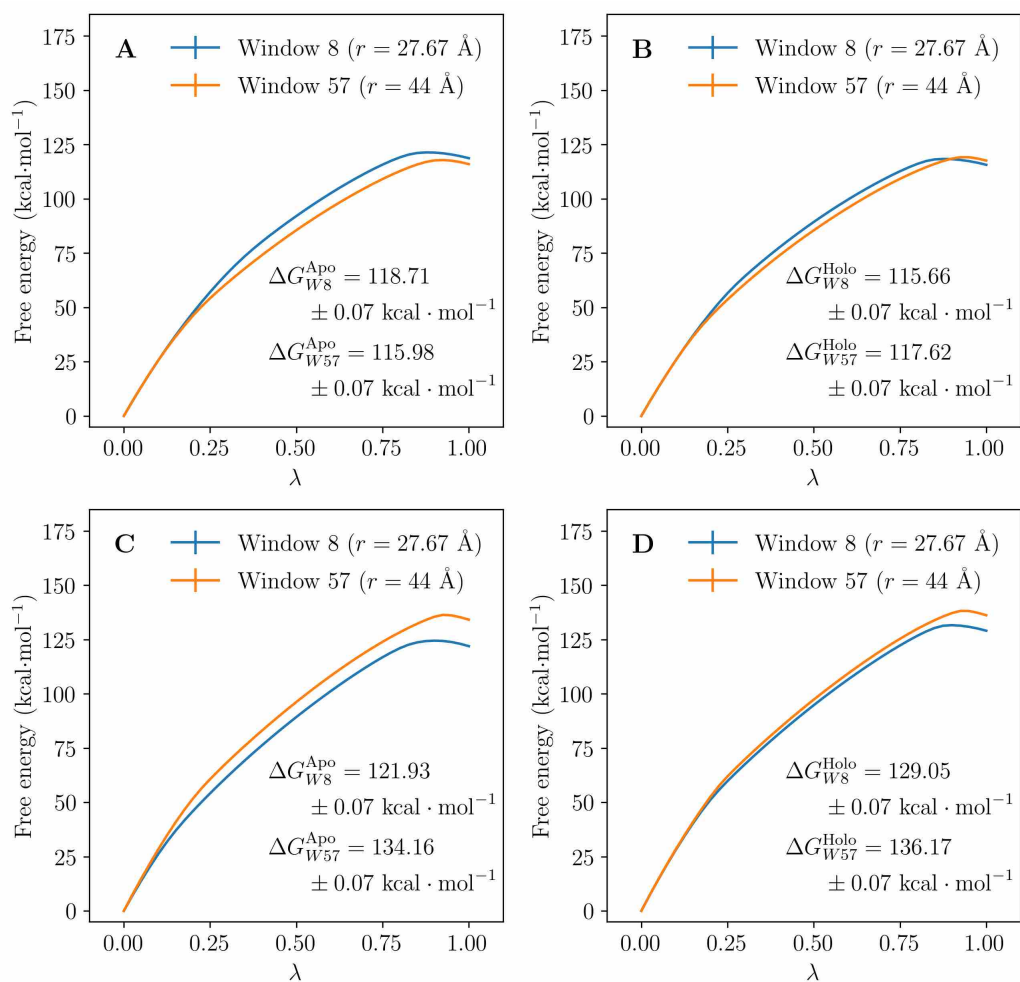

**Figure S24:** Results from alchemical free energy calculations describing protonation of BAK1 H61 and BRI1 E749, each performed with BRI1 and BAK1 close (window 8,  $r = 27.67 \text{ \AA}$ ) and distant (window 57,  $r = 44.00 \text{ \AA}$ ). On the x-axis is the alchemical parameter  $\lambda$  while on the y-axis is the MBAR-derived relative free energy of each state. **A** Protonation of apo BAK1 H61. **B** Protonation of holo BAK1 H61. **C** Protonation of apo BRI1 E749. **D** Protonation of holo BRI1 E749. This figure was produced using Matplotlib 2.2.2 [2].

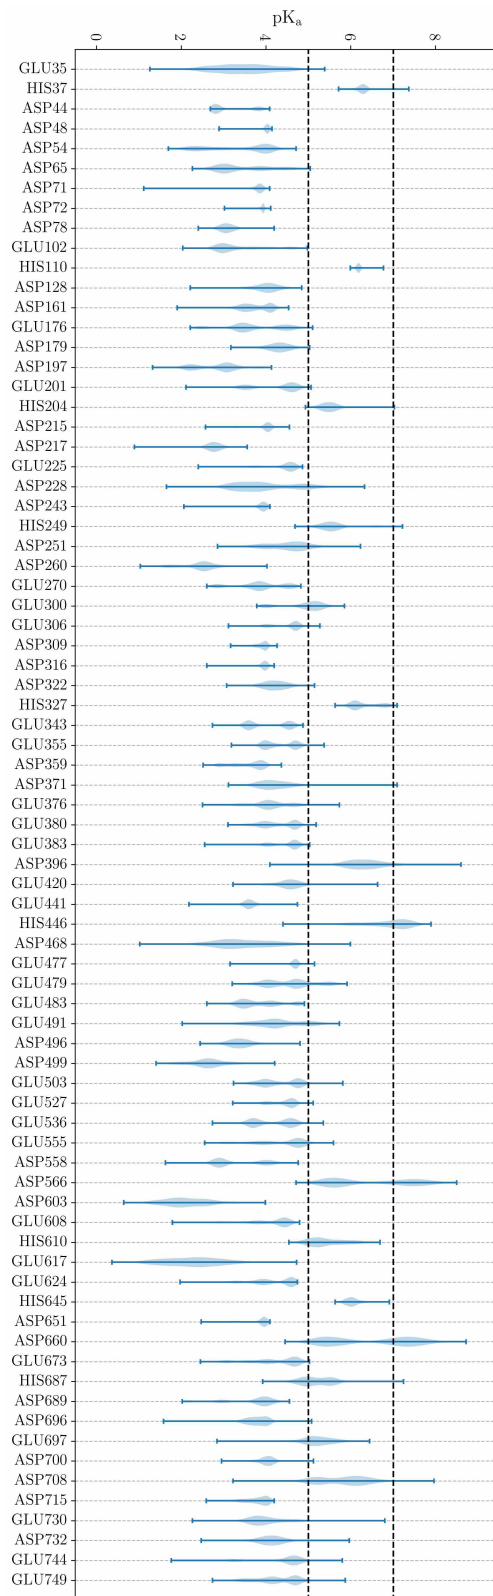

**Figure S25:** Violin plot of BRI1 sidechain pK<sub>a</sub>s for residues with sidechain pK<sub>a</sub>s close to 5, calculated from the simulations of the full, apo BRI1 ECD using PROPKA 3.1 [6, 7]. Frames were taken from apo BRI1 simulations at a rate of 10 ns<sup>-1</sup>. Bars represent the interval from the lowest to the highest calculated pK<sub>a</sub> over all frames. This figure was produced using Matplotlib 2.2.2 [2].
